# Supplementary material for: Transcriptomic Analysis of Dehydration Rate of Mature Rice (Oryza sativa) Seeds
Source: Preprints.org preprint supplement (doi:10.20944/preprints202306.0483.v1), 2023-06-07

A

CNSF5-vs-NSF5 go\_c 富集气泡图

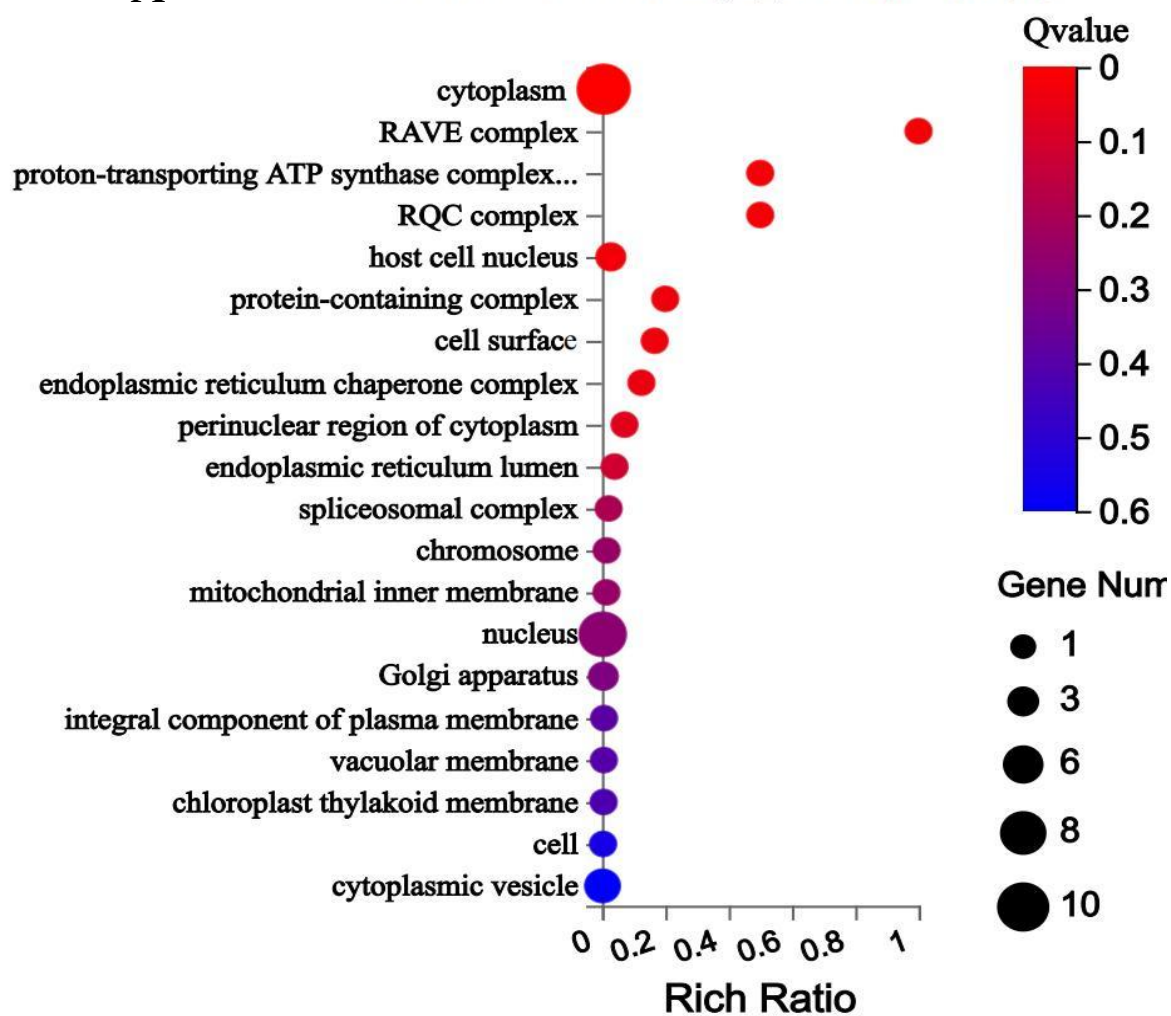

B

CNSF5-vs-NSF5 go\_f 富集气泡图

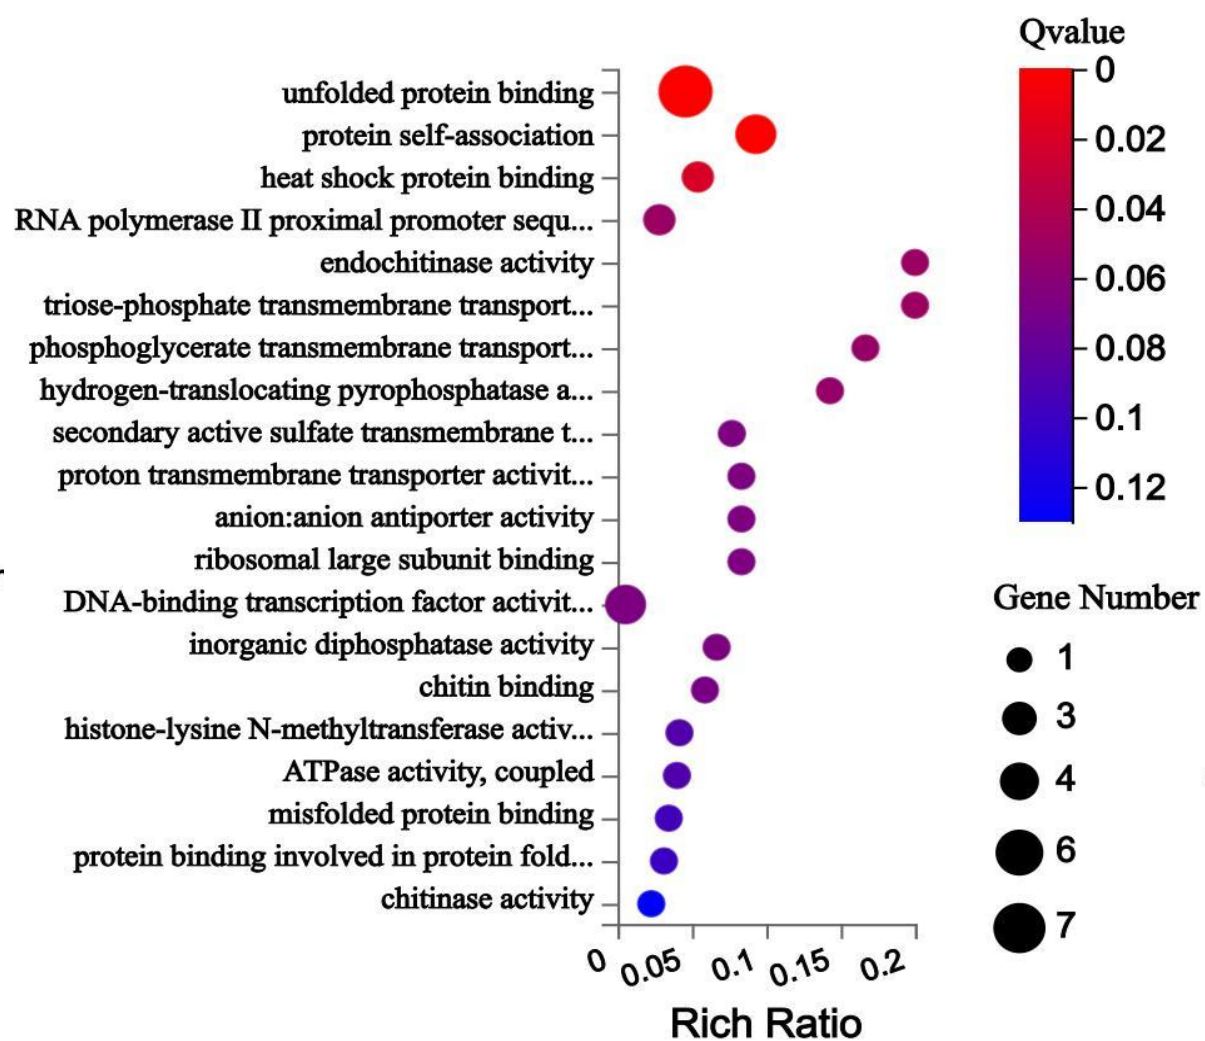

C

CNSF5-vs-NSF5 go\_p 富集气泡图

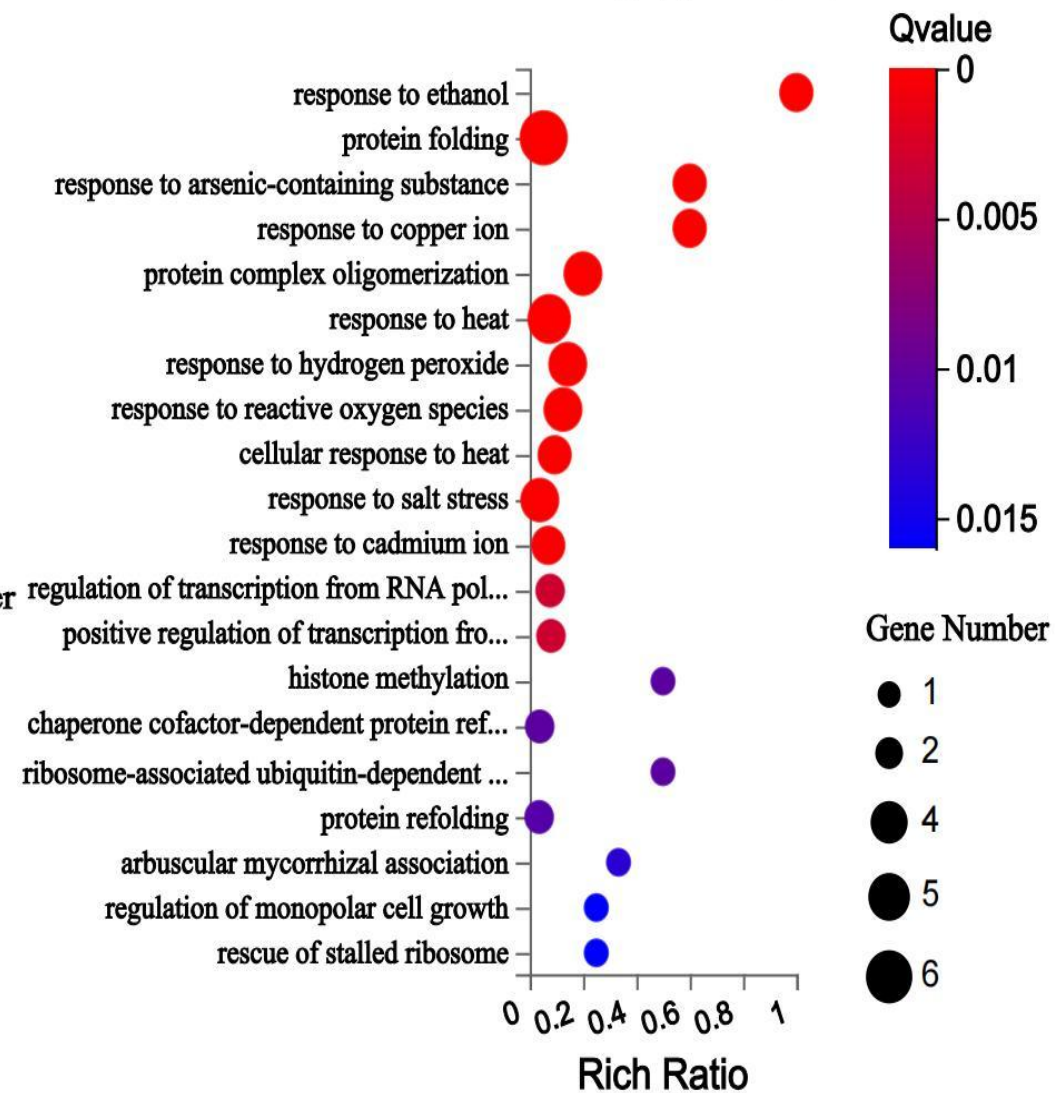

D CNSF5-vs-CNSF75 go\_c 富集气泡图

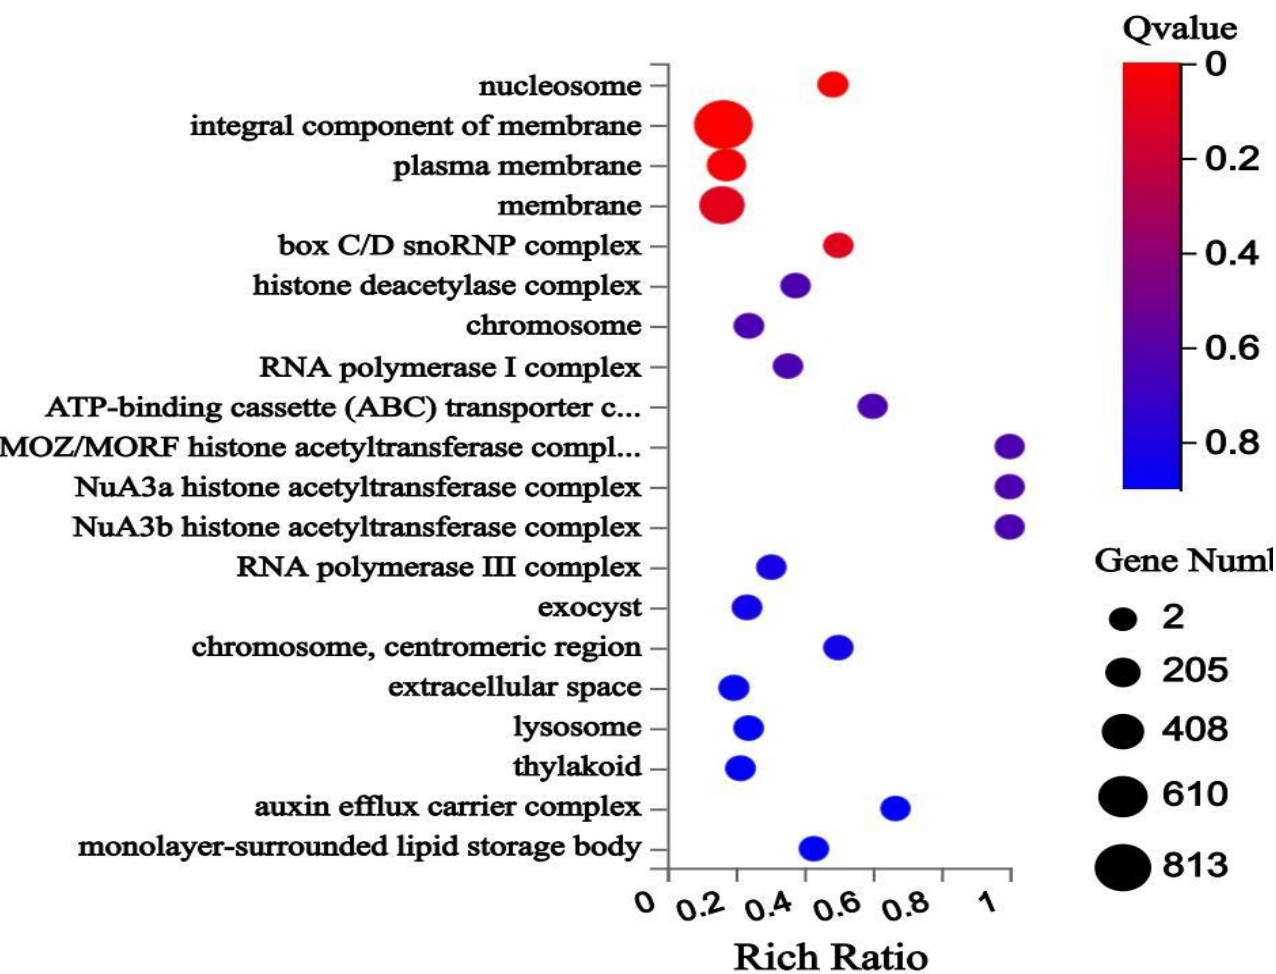

E CNSF5-vs-CNSF75 go\_f 富集气泡图

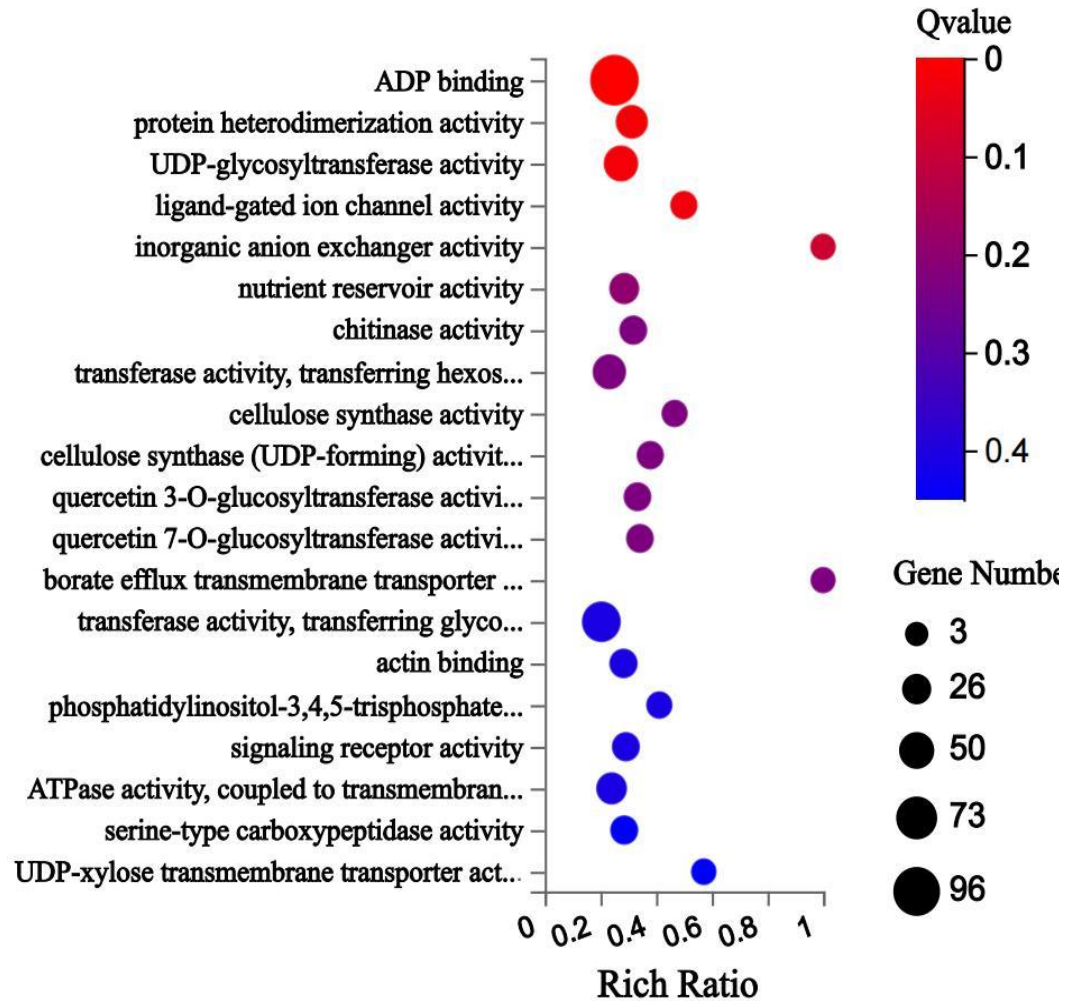

F CNSF5-vs-CNSF75 go\_p 富集气泡图

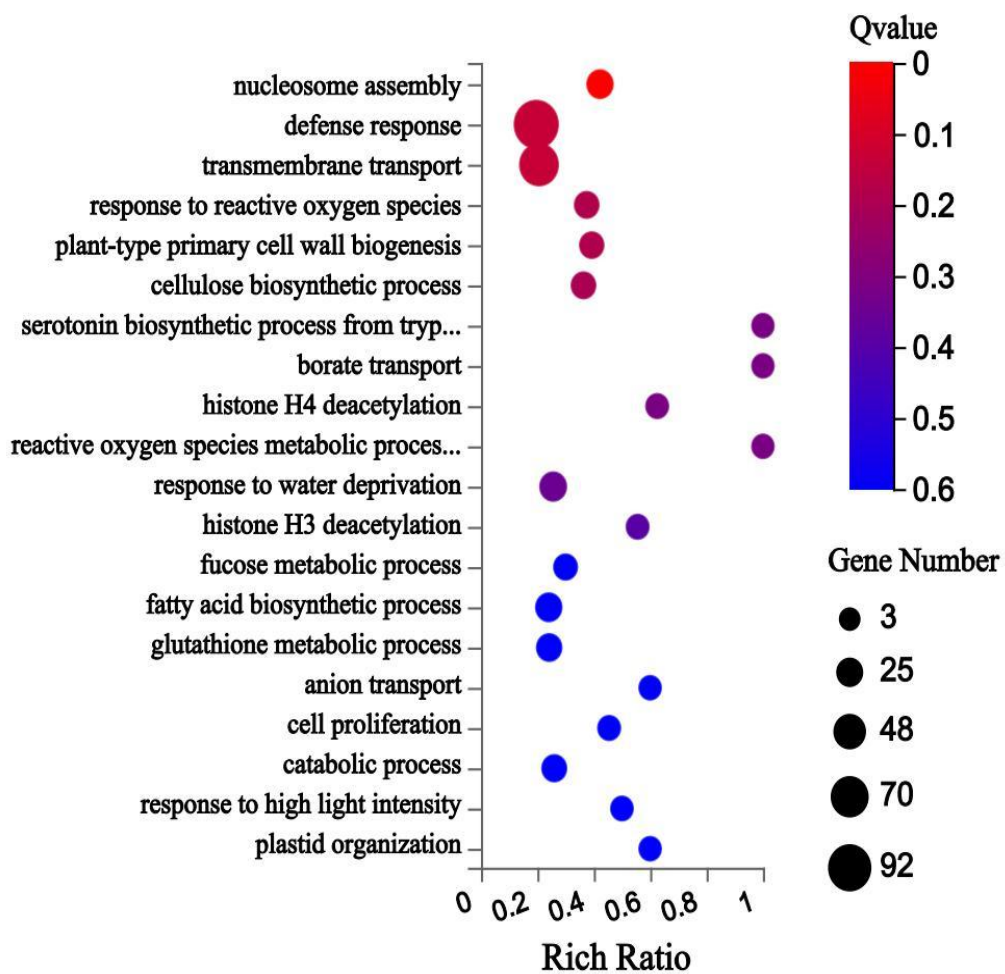



G

NSF5-vs-NSF75 go\_c 富集气泡图

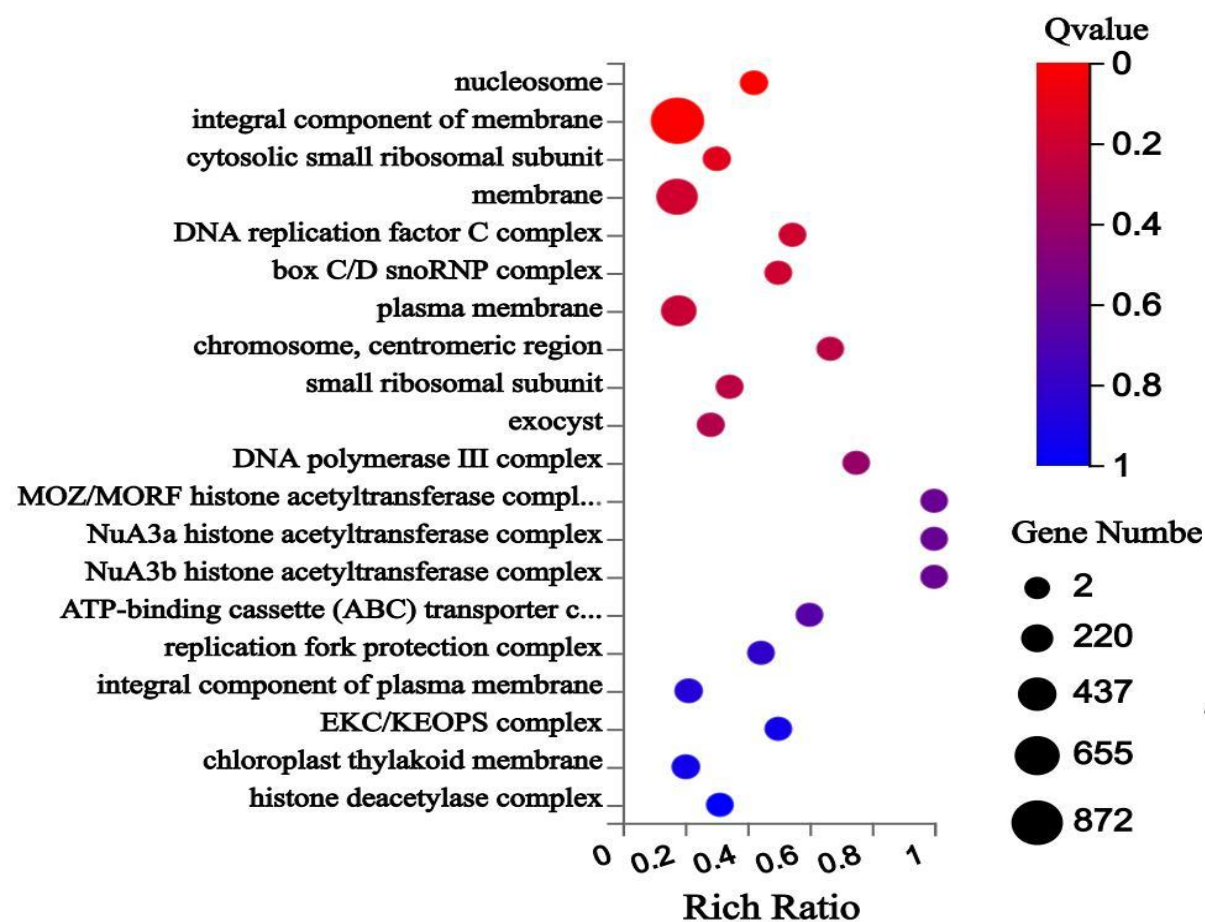

H

NSF5-vs-NSF75 go\_f 富集气泡图

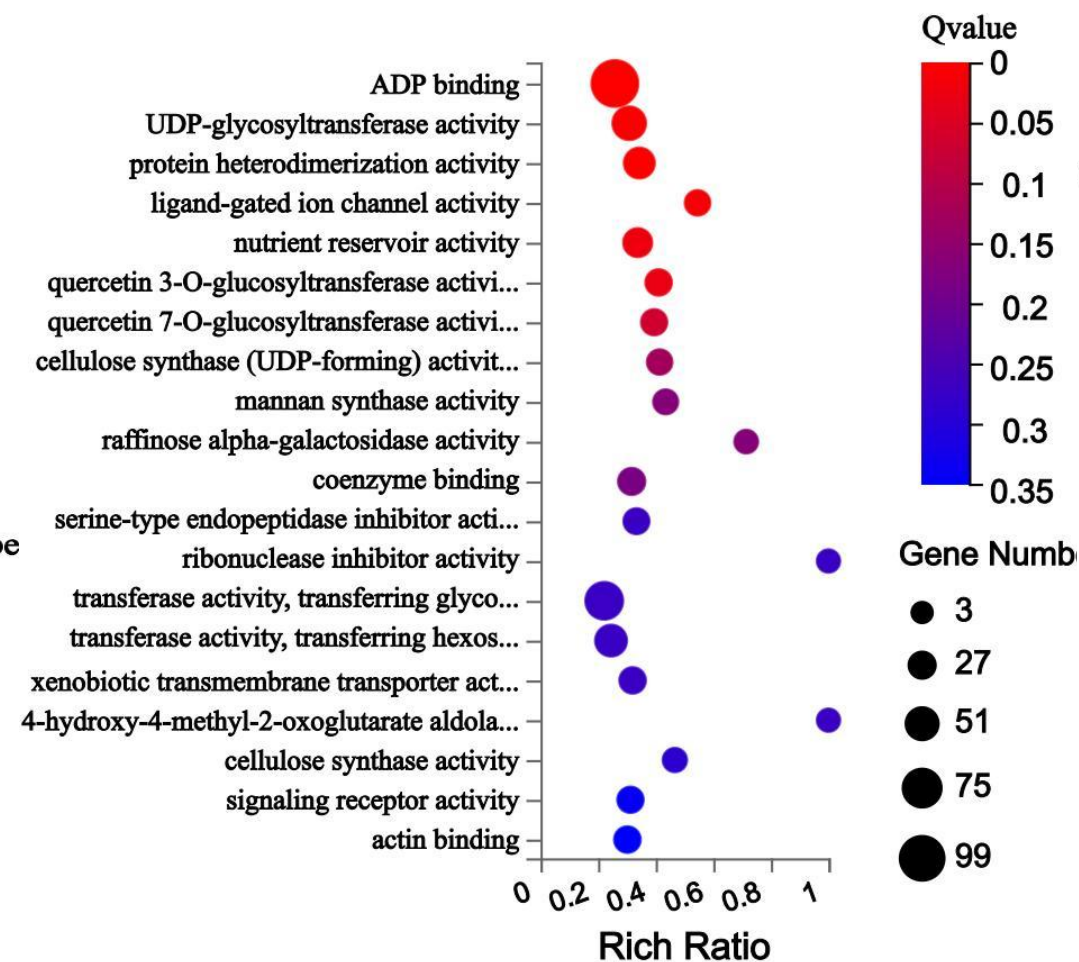

I

NSF5-vs-NSF75 go\_p 富集气泡图

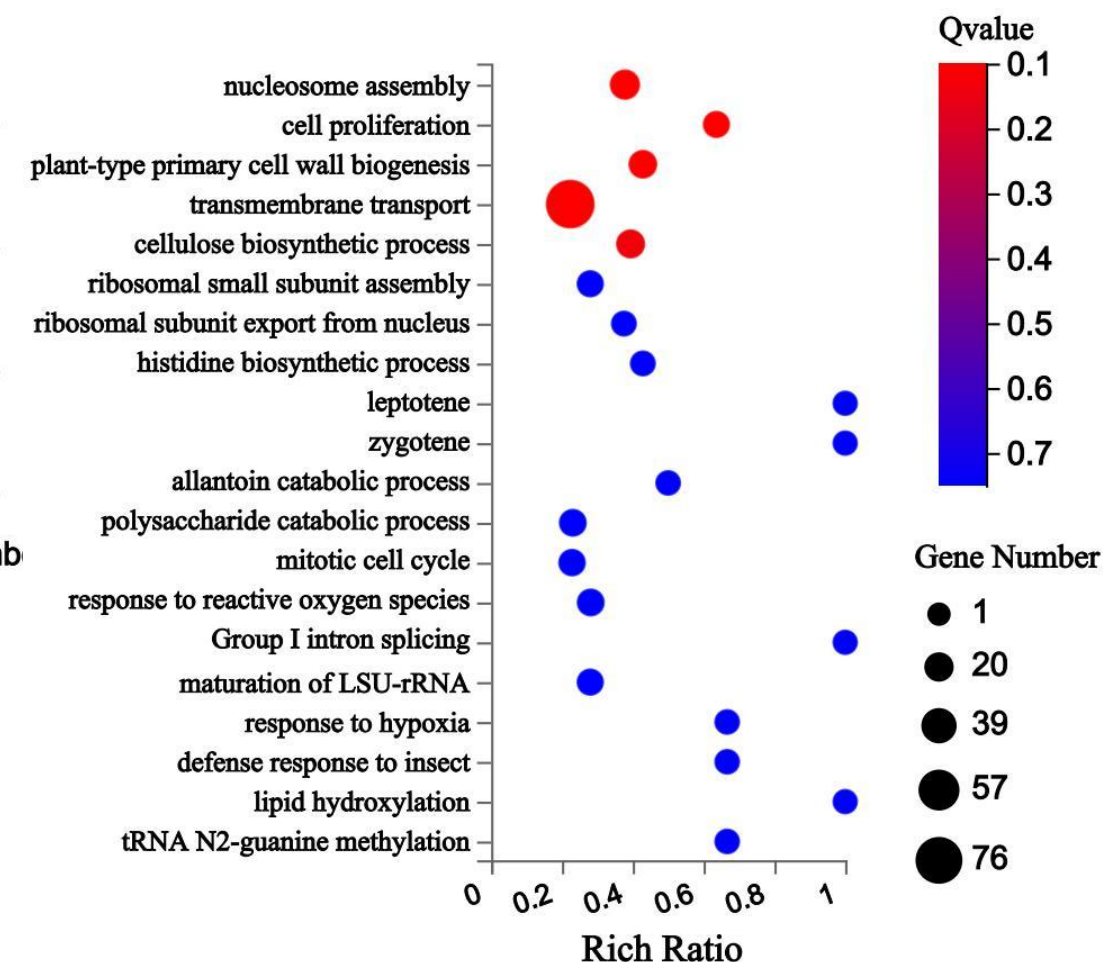

J

CNSF75-vs-NSF75 go\_c 富集气泡图

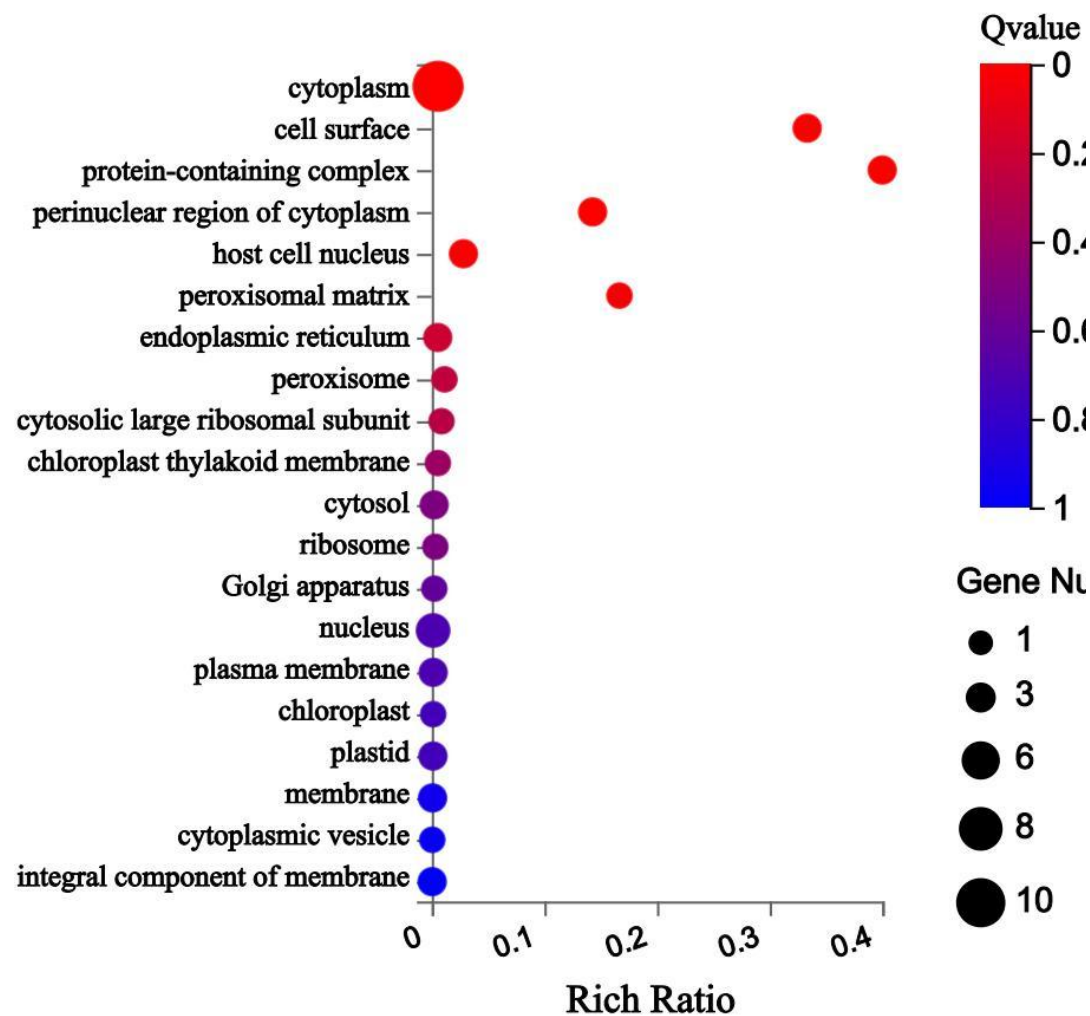

K

CNSF75-vs-NSF75 go\_f 富集气泡图

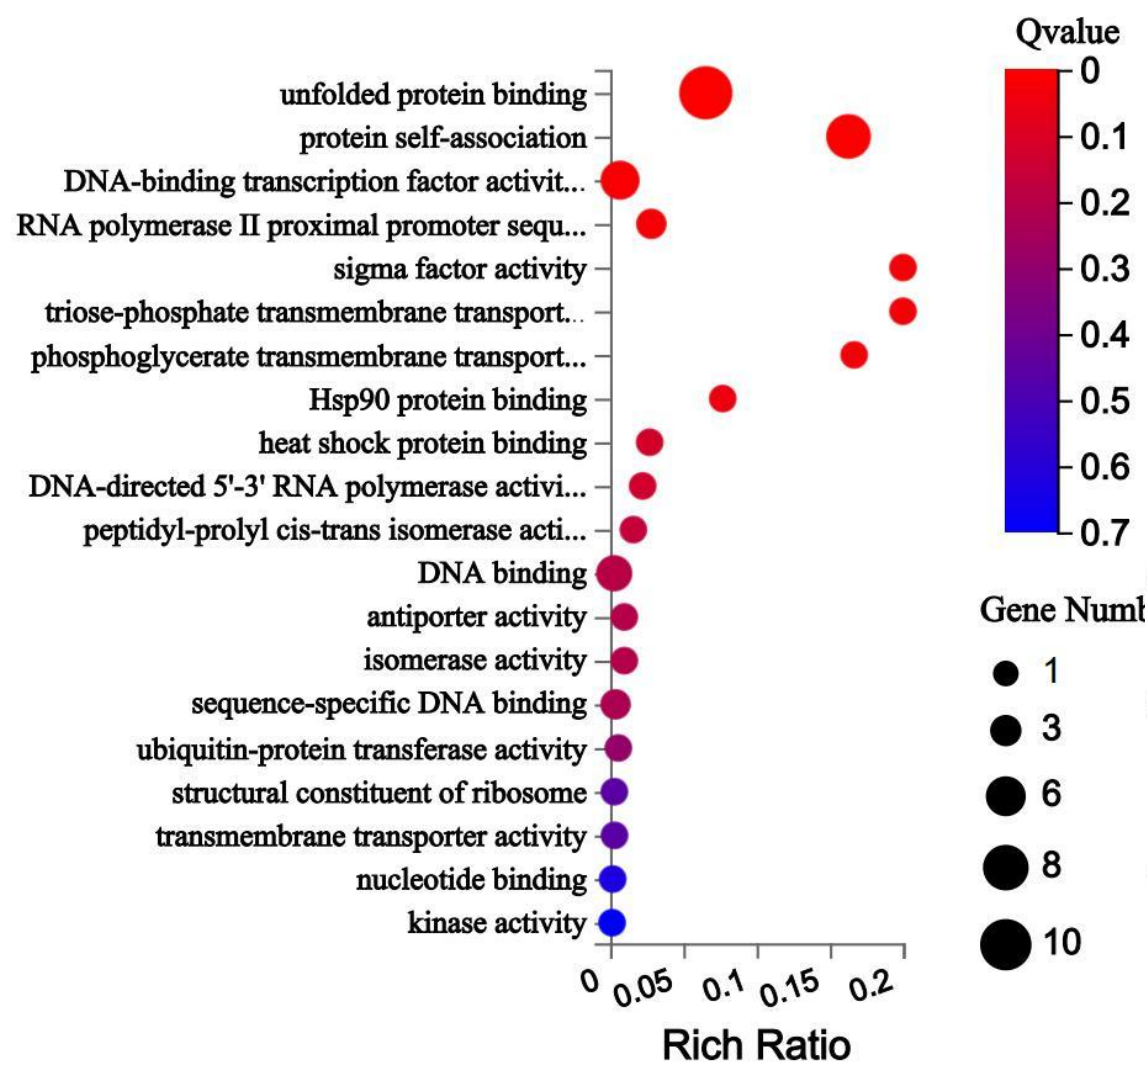

L

CNSF75-vs-NSF75 go\_p 富集气泡图

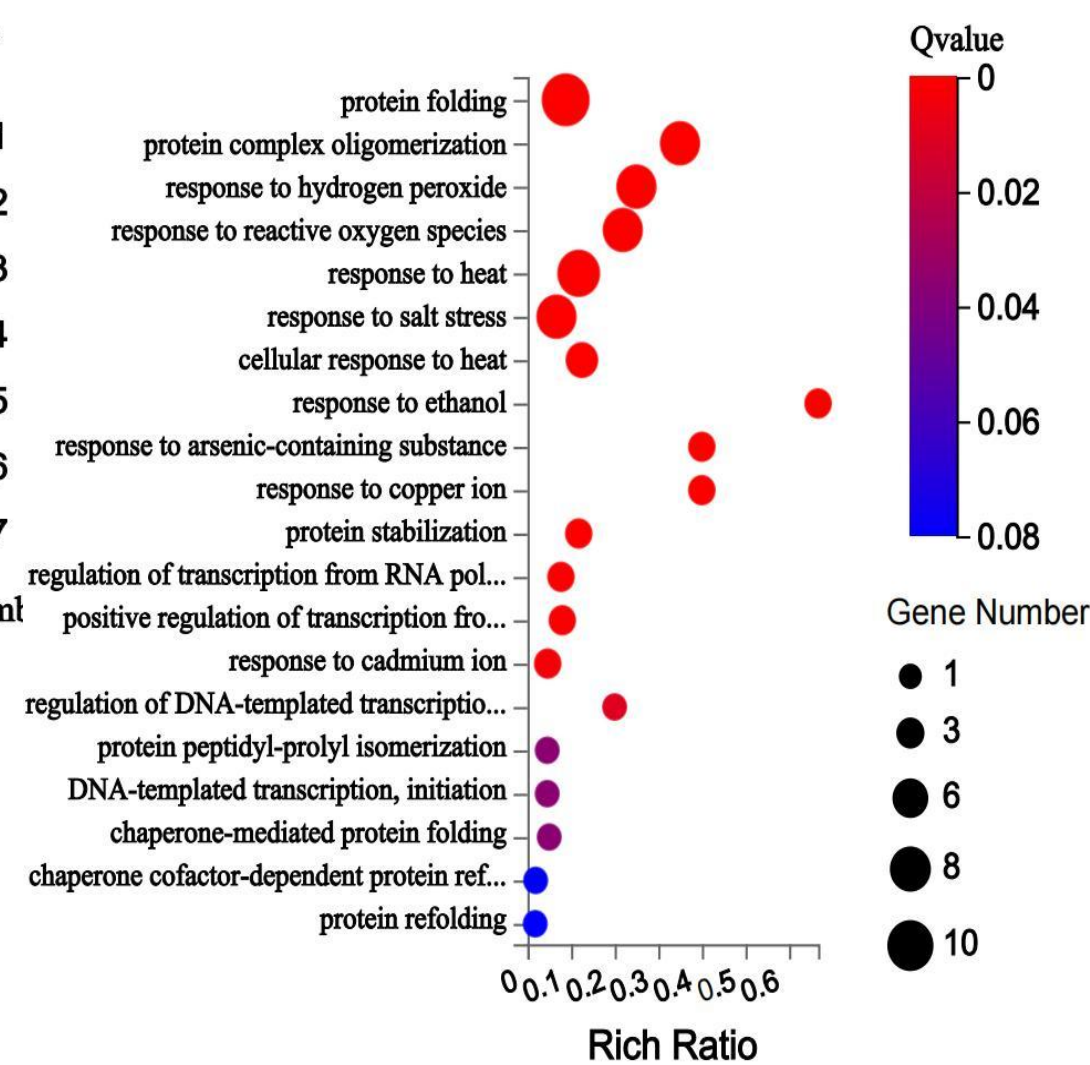

Supplement: Supplementary file 2 [file supplementary]
