# Supplementary material for: Transcriptomic Analysis of Dehydration Rate of Mature Rice (Oryza sativa) Seeds
Source: Preprints.org preprint supplement (doi:10.20944/preprints202306.0483.v1), 2023-06-07

A

CNSF5-vs-NSF5 kegg\_pathway 富集气泡图

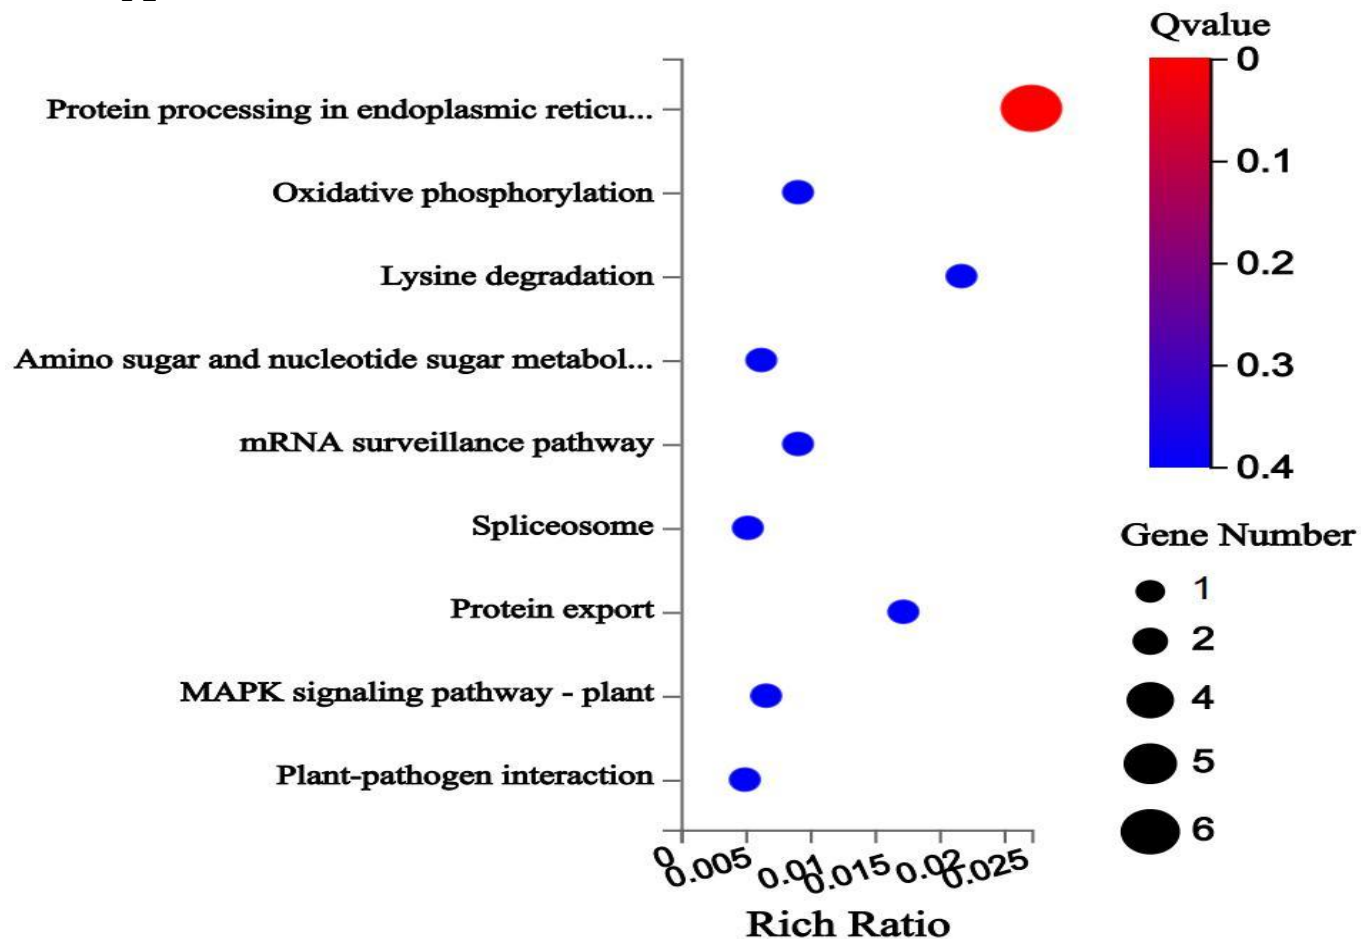

B

CNSF5-vs-CNSF75 kegg\_pathway 富集气泡图

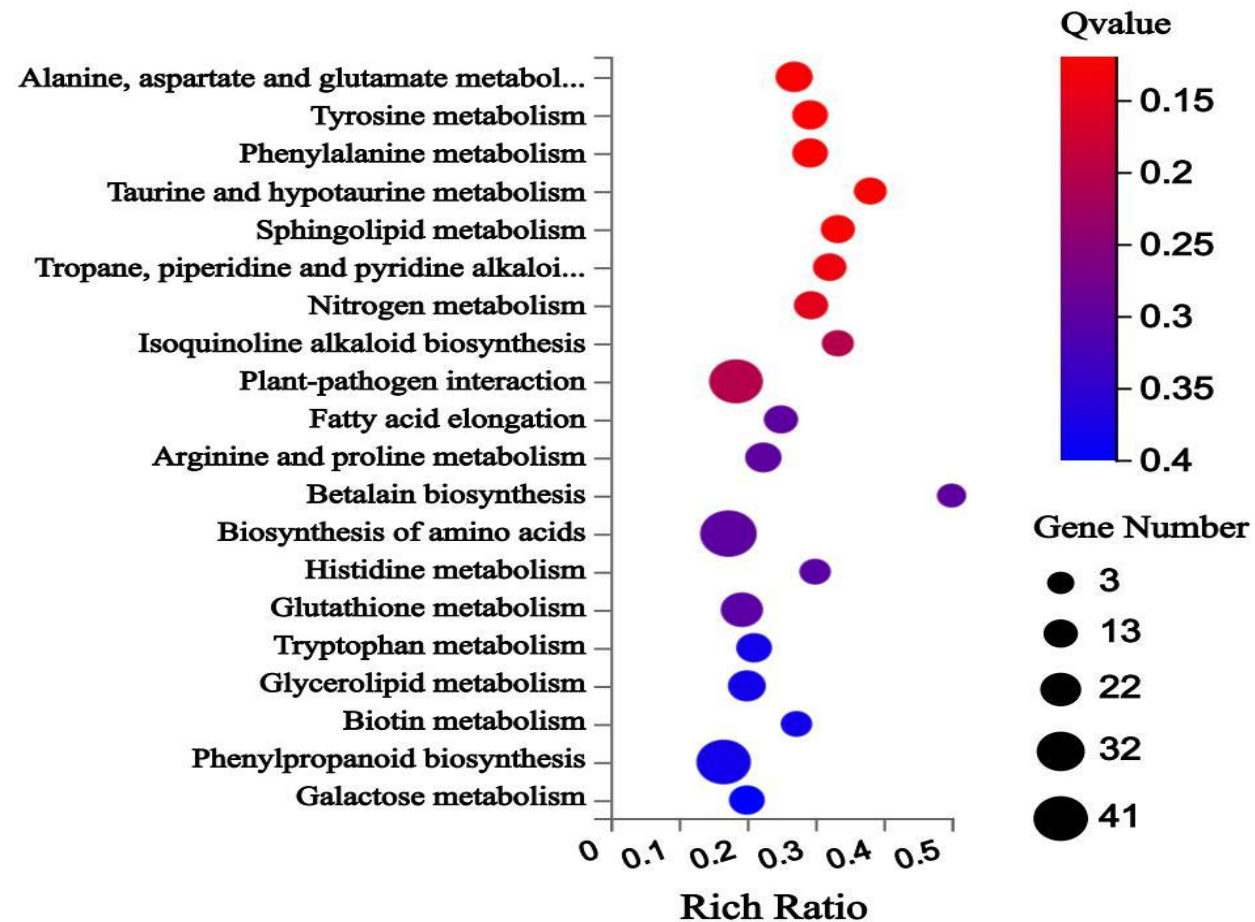

C NSF5-vs-NSF75 kegg\_pathway 富集气泡图

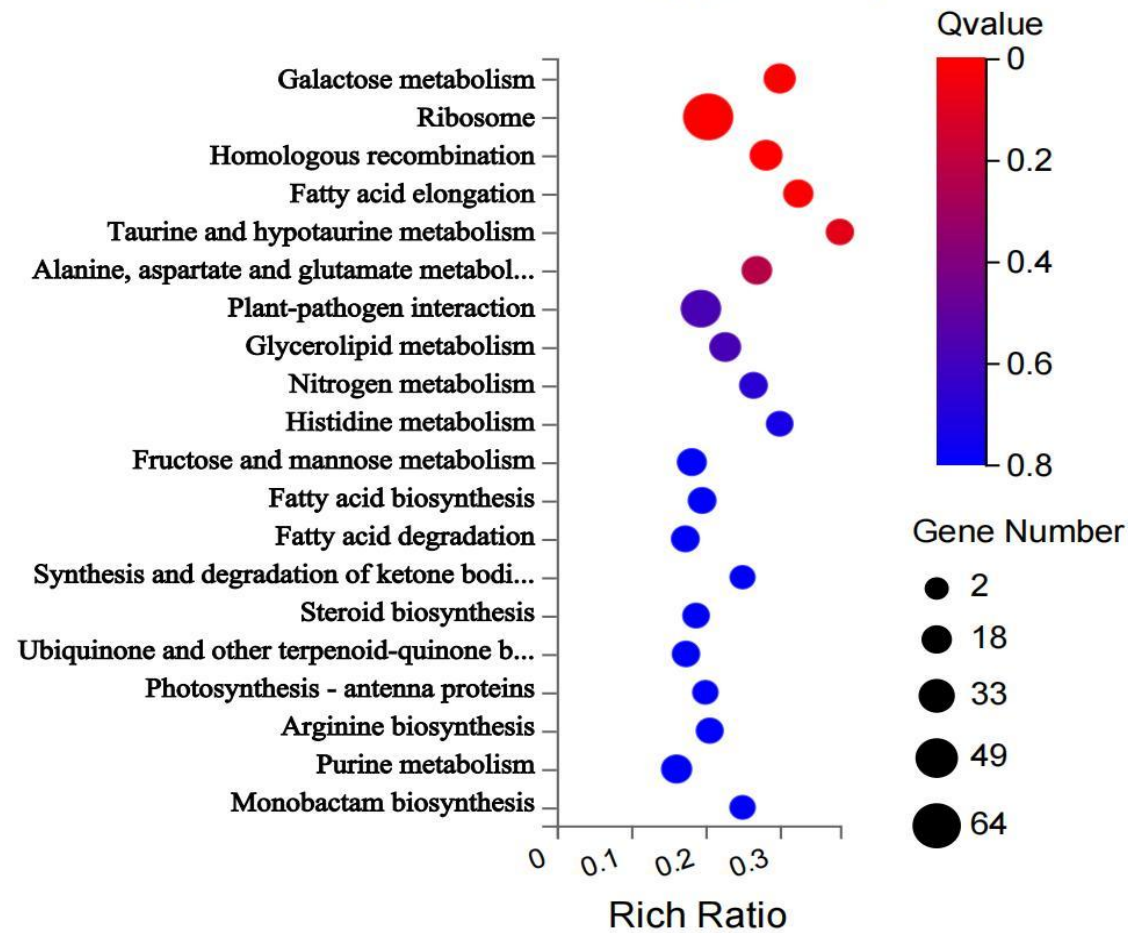

D CNSF75-vs-NSF75 kegg\_pathway 富集气泡图

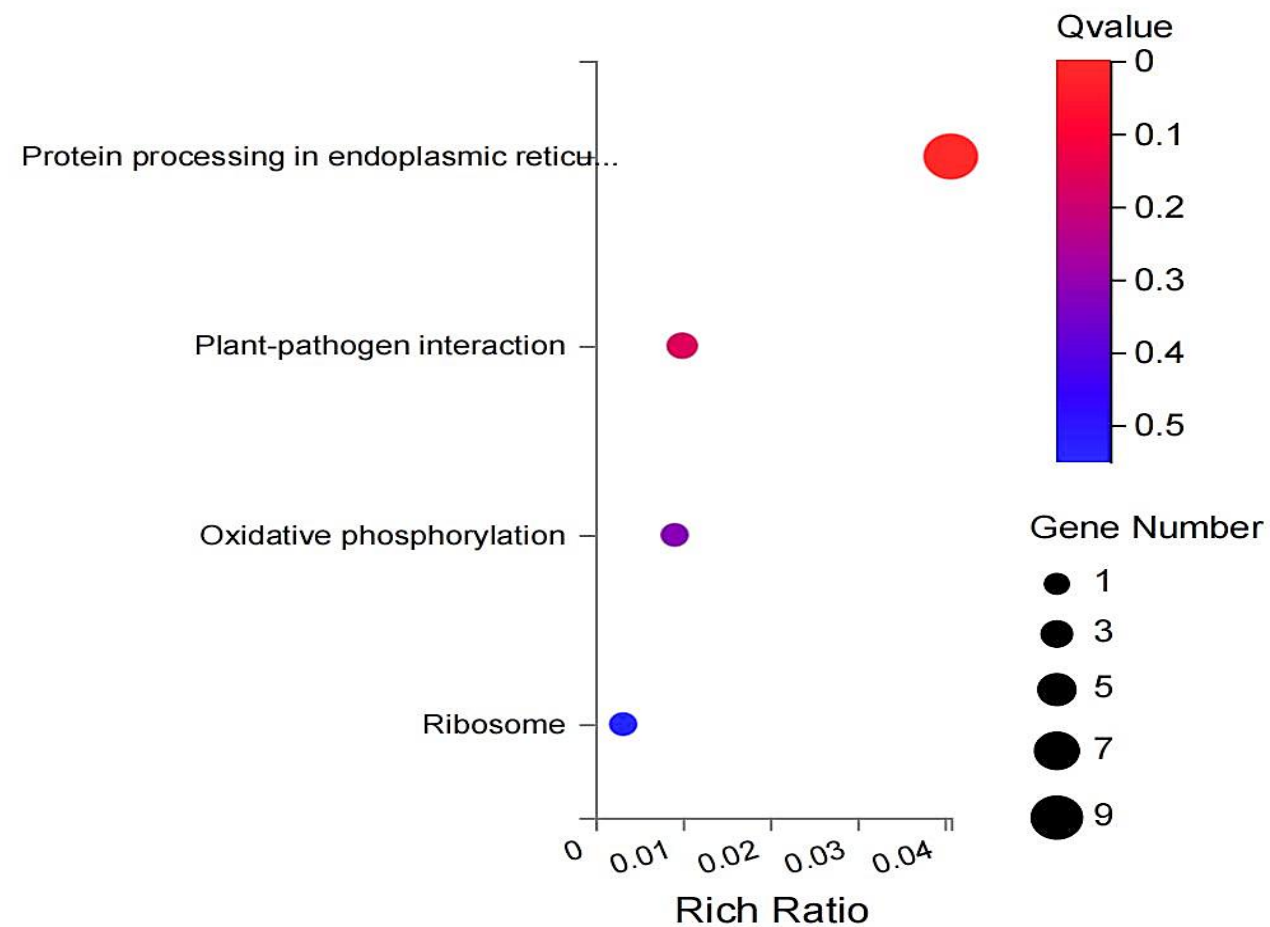

Supplement: Supplementary file 6 [file supplementary]
