# Supplementary figures and images for: Transcriptomic Analysis of Dehydration Rate of Mature Rice (Oryza sativa) Seeds
Source: Preprints.org preprint supplement (doi:10.20944/preprints202306.0483.v1), 2023-06-07

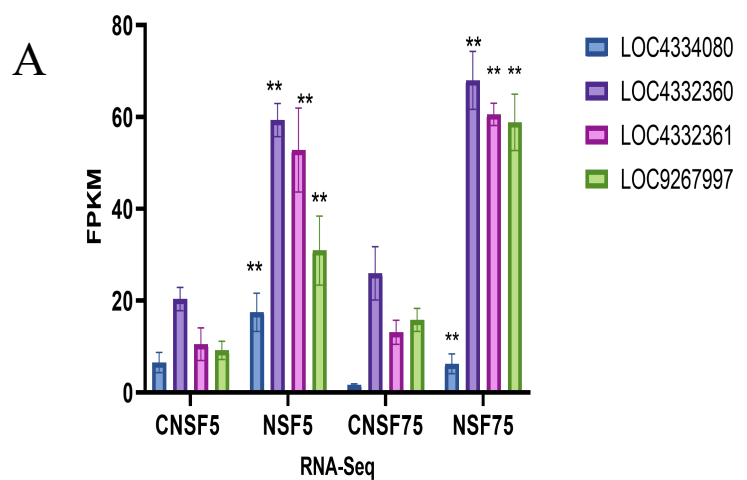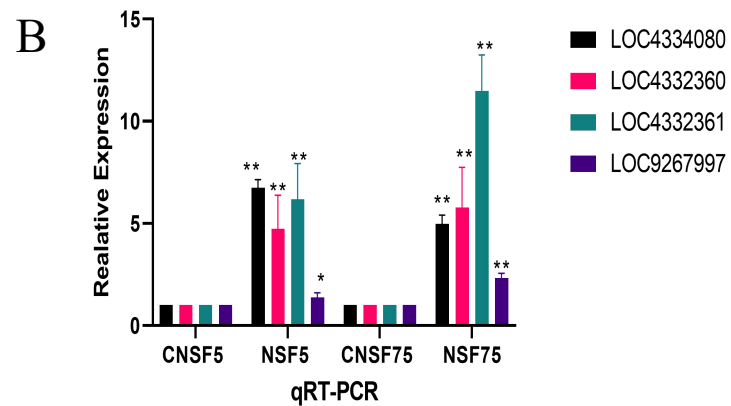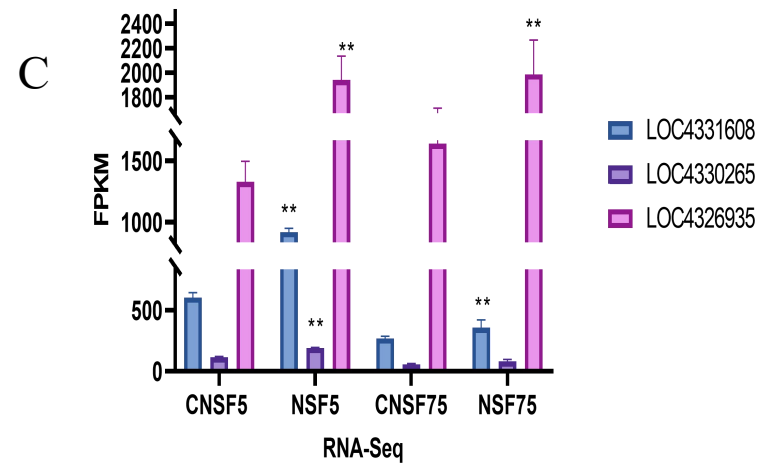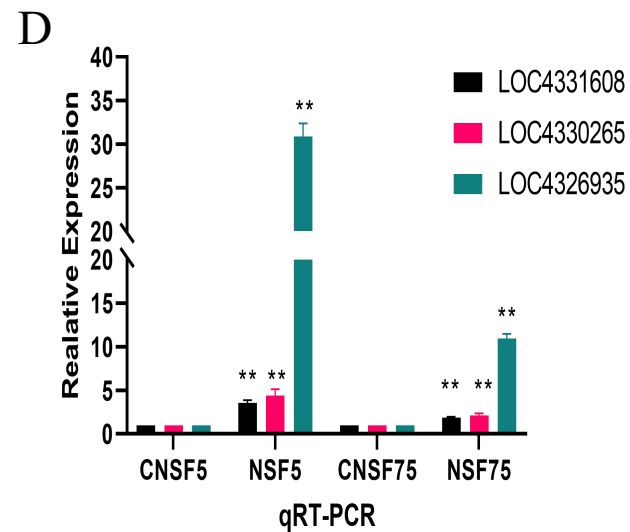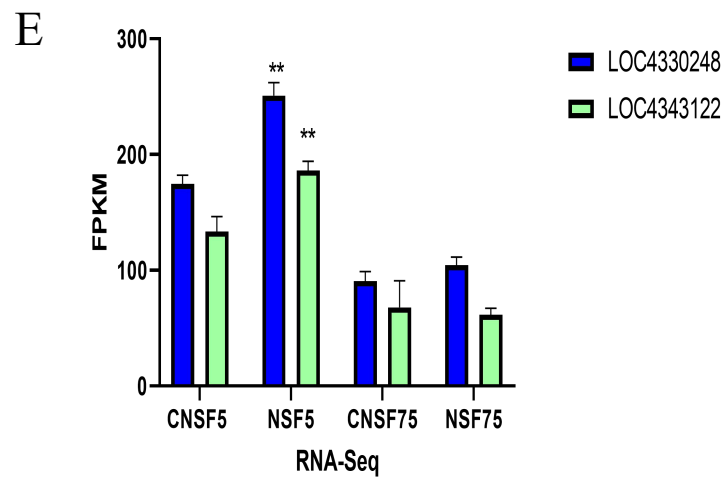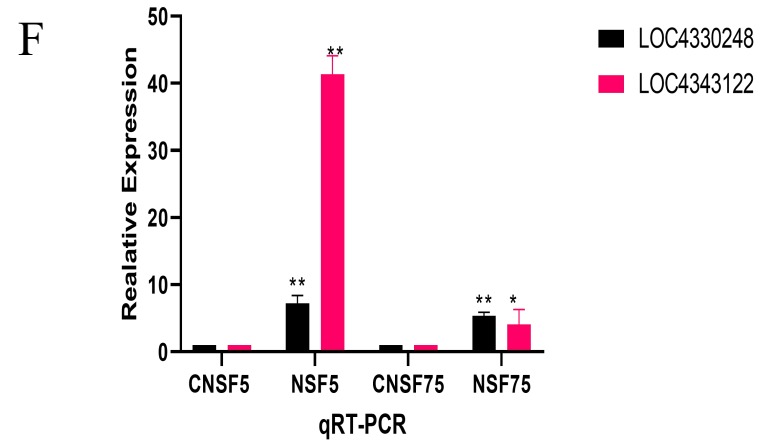

Supplement: Supplementary file 1 [file supplementary]

A

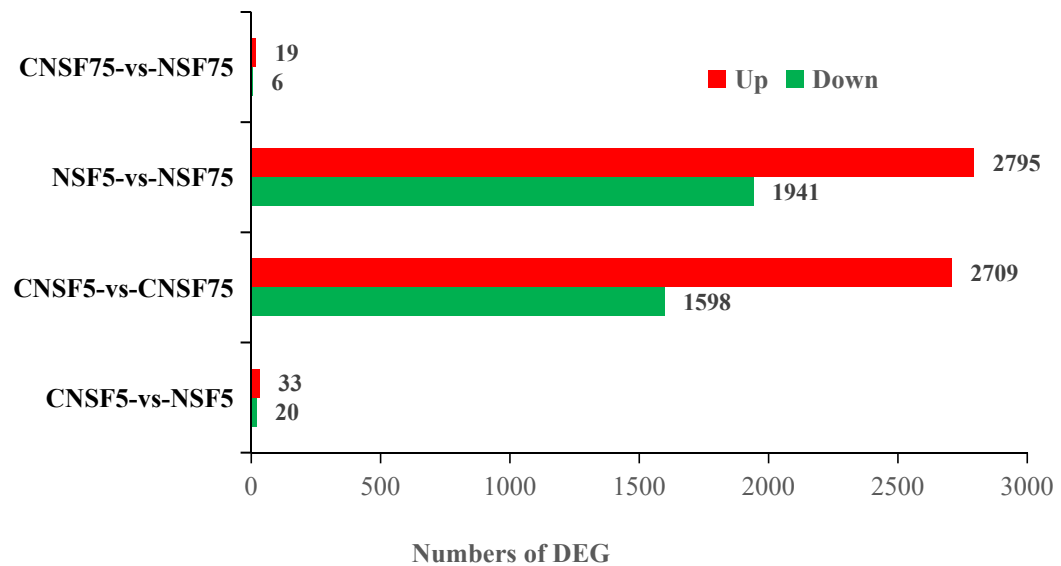

B

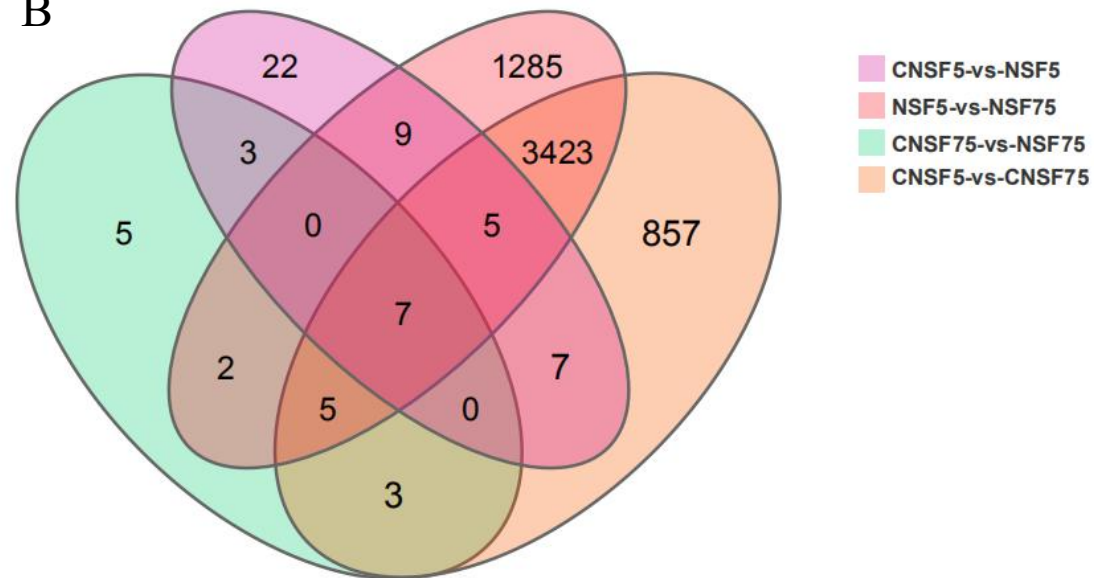

Supplement: Supplementary file 3 [file supplementary]

A

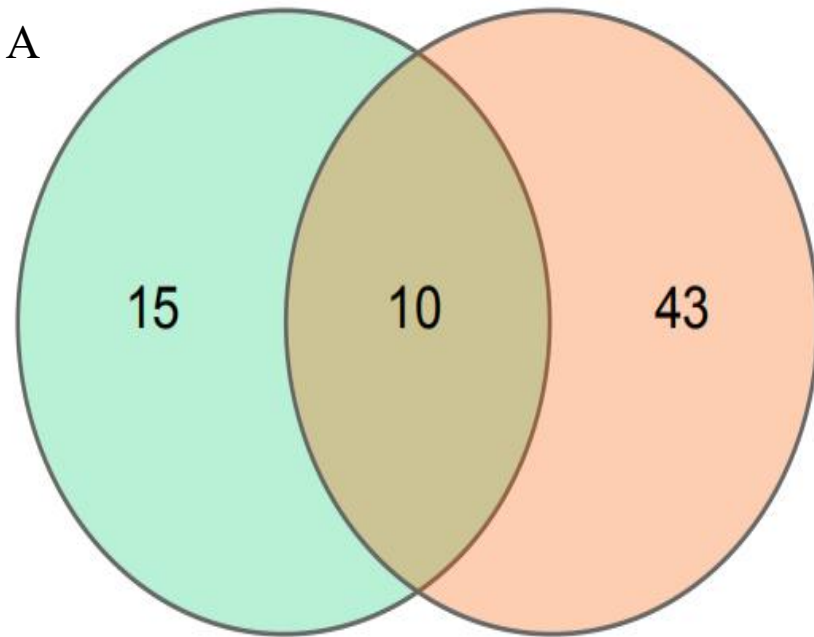

CNSF75-vs-NSF75  
CNSF5-vs-NSF5

B

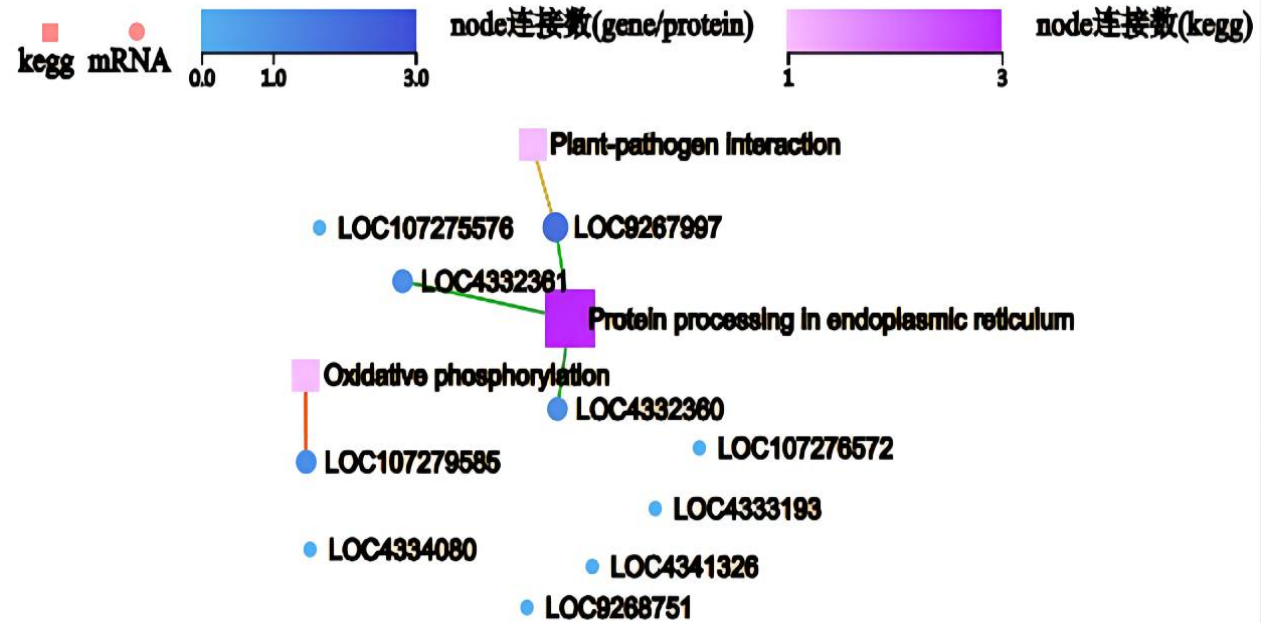

Supplement: Supplementary file 4 [file supplementary]

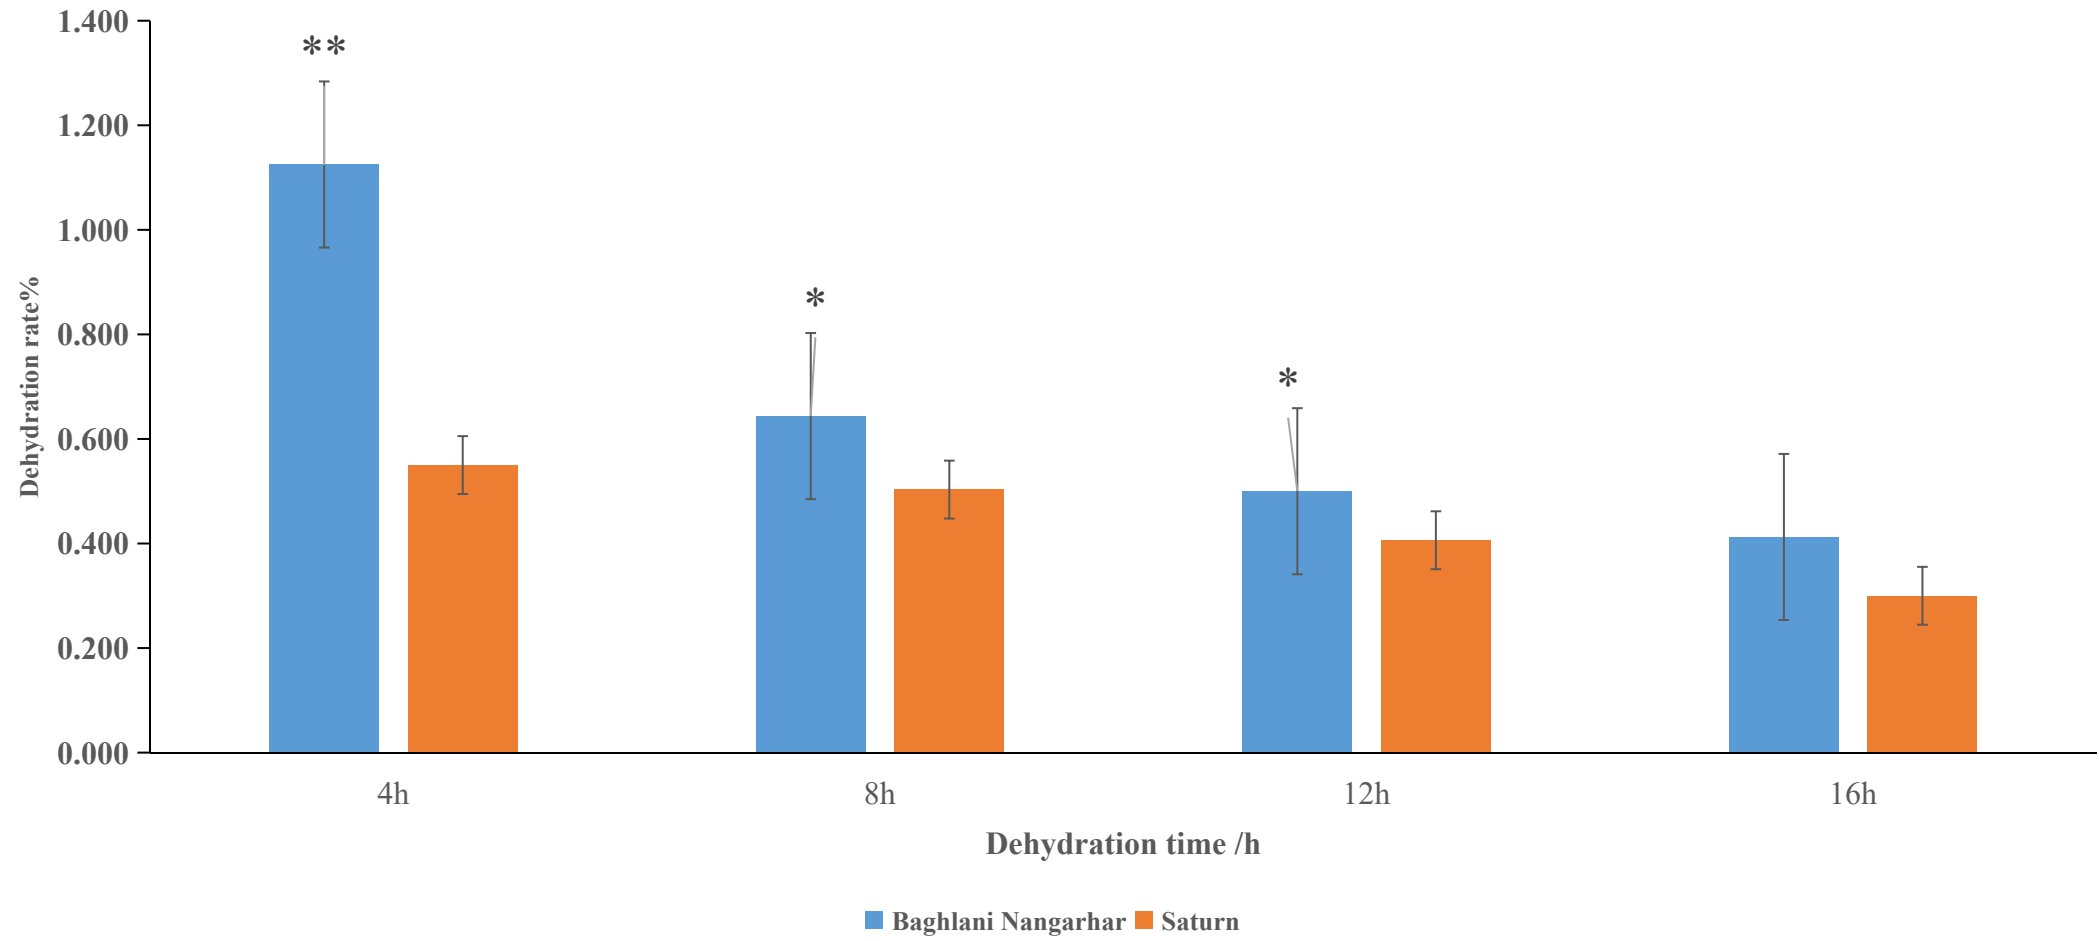

Supplement: Supplementary file 5 [file supplementary]
